# Supplementary material
Source: publisher figshare collection journal article supplement (https://acs.figshare.com/ndownloader/files/4529689)
Supplement: Supplementary file 1 [file 4529689]

## Supplementary Information (SI)

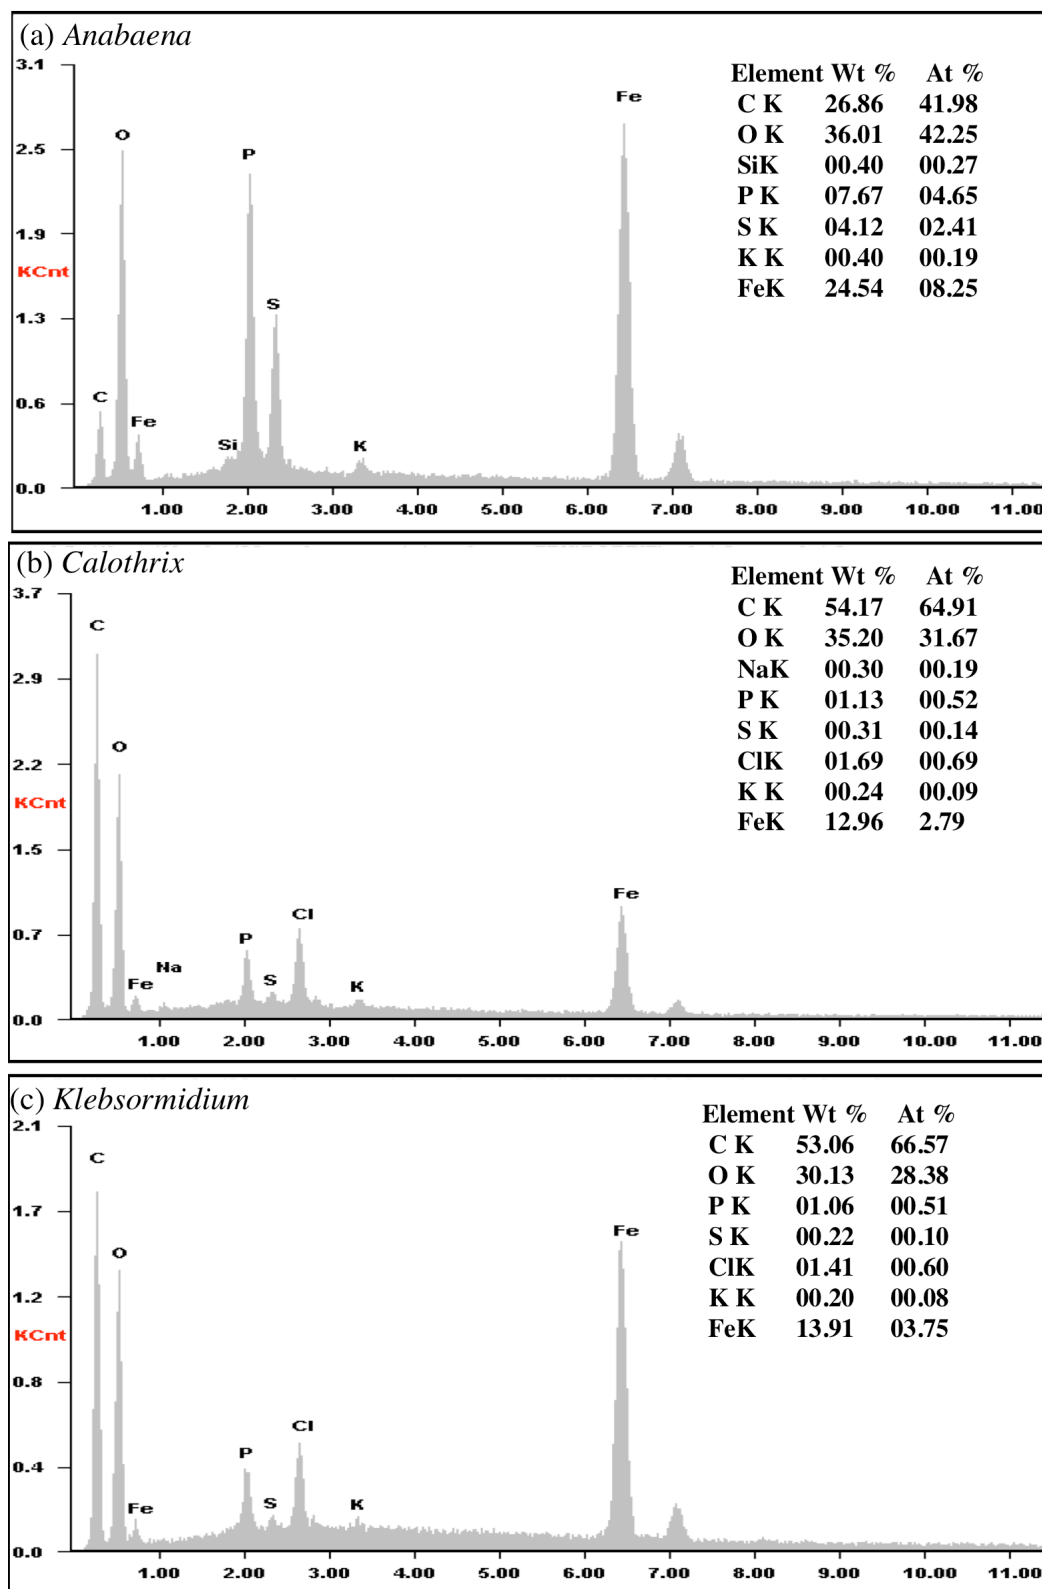

SI-1. EDS analysis of (a) *Anabaena*, (b) *Calothrix* and (c) *Klebsormidium* micro-algae after iron salts addition.

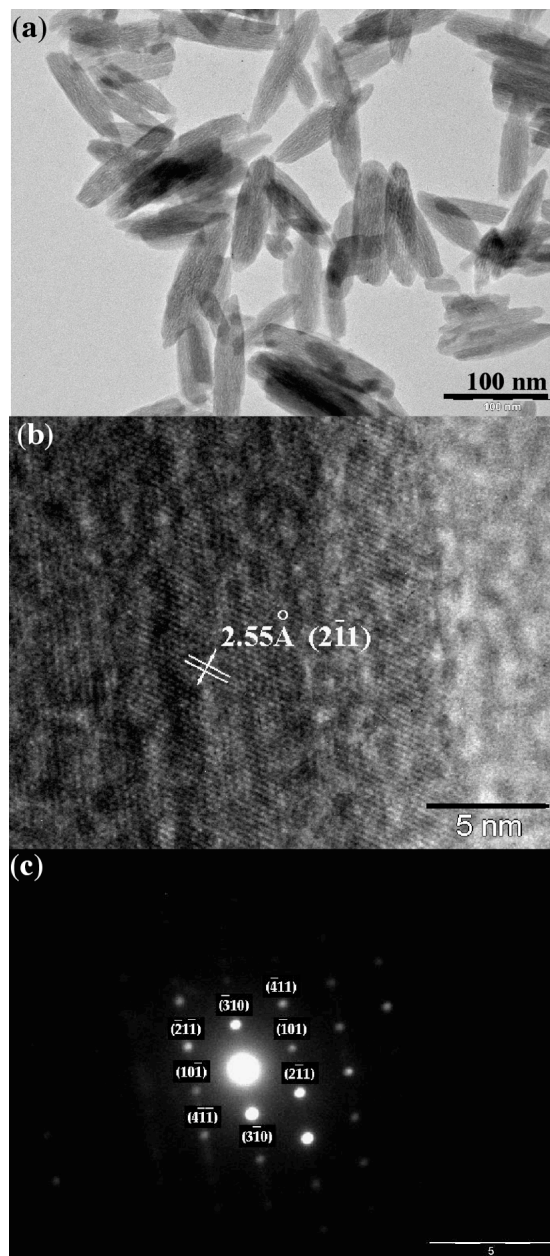

SI-2. *In vitro* synthesized  $\beta$ -FeOOH nanorods as seen from (a) TEM, (b) HRTEM. The corresponding selected area diffraction (SAED) pattern could be indexed as the [131] zone axis of the tetragonal  $\beta$ -FeOOH structure (c).

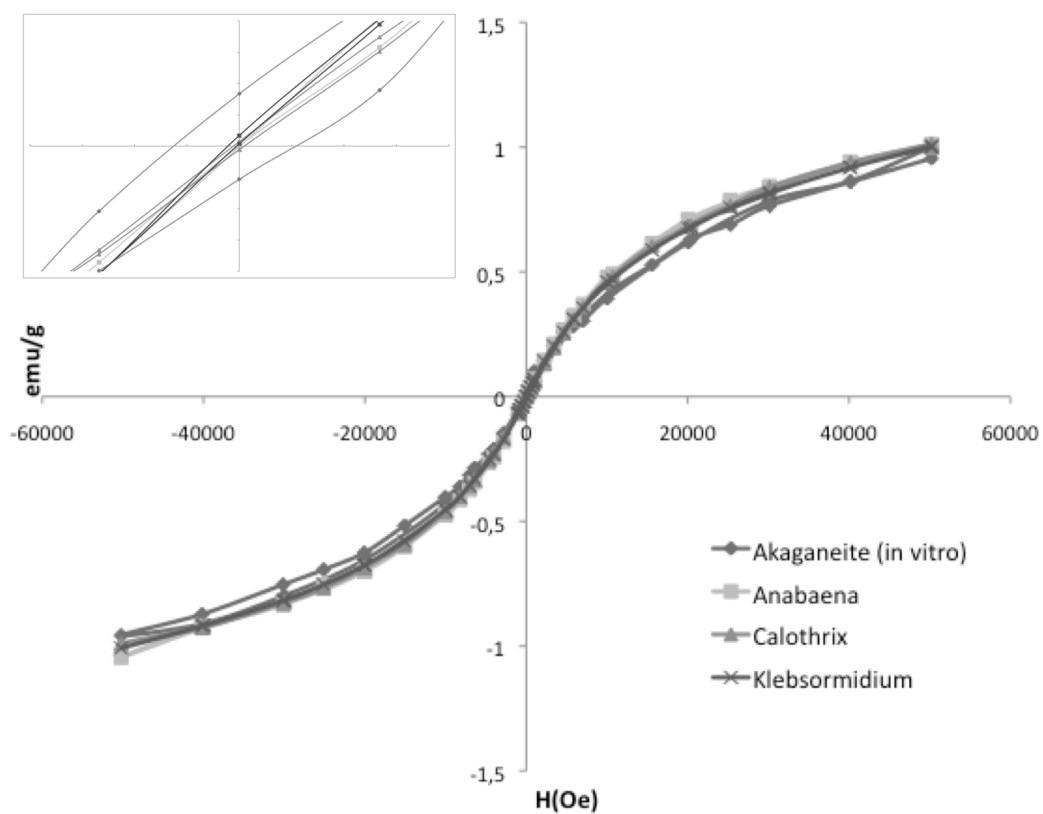

SI-3. (a) hysteresis curve recorded at 4.5 K for *in vitro* and *in vivo*  $\beta$ -FeOOH. Insert : enlargement at low field.
